# Supplementary material
Source: PubMed Central journal article supplement (PMC2872802)
Supplement: supp_74_18_1473__1.pdf [file supp_74_18_1473__1.pdf]

**Table E-1: Autoantibody testing**

---

Negative results

thyroperoxidase, thyroglobulin

ANA, ENA (RNP, Jo, Smith, SS-A, SS-B, centromere), ANCA, myeloperoxidase, serine protease-3

cancer-associated retinopathy (CAR)

ampiphysin

Hu

Ma

Ta

Ri

Yo

zinc finger-4 (Zic4)

voltage-gated potassium channel (VGKC)

anti-neuronal nuclear antibody (ANNA) 1-3

anti-glial nuclear antibody (AGNA)

Purkinje cell Ab (PCA) 1-3

collapsin response-mediator protein-5 (CRMP-5)

striational antibody

P/Q/N-type voltage-gated calcium channel (VGCC)

acetylcholine receptor antibody

GAD-65 (glutamic acid decarboxylase)

NMO (aquaporin-4) (tested both while on immunosuppressive therapy and while off all therapy for eight weeks)

Positive results

NMDA receptor (NR1/NR2 heteromer)

myelin basic protein

---
