# Supplementary material
Source: PubMed Central journal article supplement (PMC2872802)
Supplement: supp_74_18_1473__2.pdf [file supp_74_18_1473__2.pdf]

**Table E-2: Autoantibody testing**

| Clinical signs/symptoms                                                                                                                                                                                           | Time course                                                 | Therapy initiated                                                                                                                                 | Response                                                                                                                                |
|-------------------------------------------------------------------------------------------------------------------------------------------------------------------------------------------------------------------|-------------------------------------------------------------|---------------------------------------------------------------------------------------------------------------------------------------------------|-----------------------------------------------------------------------------------------------------------------------------------------|
| encephalopathy<br>hyporesponsiveness<br>respiratory failure<br>orofacial dyskinesias<br>complex partial seizures                                                                                                  | initial presentation                                        |                                                                                                                                                   |                                                                                                                                         |
| meningeal signs<br>right sided weakness<br>dysarthria<br>ataxia                                                                                                                                                   | + one month                                                 | long-term oral<br>corticosteroids<br>(outside hospital)                                                                                           | significant improvement                                                                                                                 |
| optic neuritis                                                                                                                                                                                                    | + six months                                                | IV corticosteroids                                                                                                                                | symptom resolution                                                                                                                      |
| weakness<br>dysarthria<br>ataxia<br>anesthesia<br>pyramidal tract signs<br>internuclear ophthalmoplegia<br>cognitive impairment<br>urinary incontinence<br>dysphagia<br>loss of ambulation<br>labile emotionality | monthly<br>exacerbations<br>with accumulating<br>disability | IV corticosteroids<br>(multiple acute<br>exacerbations)<br><br>beta interferon 1a<br><br>plasmapheresis<br><br>IVIg<br><br>pulse cyclophosphamide | nonsustained response<br><br>no effect on subsequent<br>relapse rate<br><br>partial response<br><br>no response<br><br>partial response |
| wheelchair-dependent<br>pseudobulbar affect<br>significantly cognitively<br>impaired<br>fluctuating weakness and ataxia<br>visually impaired<br>incontinent<br>(EDSS =8)                                          | one year after initial presentation                         | rituximab<br>monthly plasmapheresis<br>monthly IV corticosteroids<br>monthly pulse cyclophosphamide                                               | resolution of symptoms                                                                                                                  |
| independently ambulating<br>(w/o limitation)<br>Mild memory impairment<br>Impulsivity<br>Normal vision<br>Normal motor skills<br>(EDSS =1.5)                                                                      | 18 months after initial presentation                        | mycophenolate mofetil                                                                                                                             | maintenance                                                                                                                             |

Combined regimen: rituximab dose = 1000 mg in two infusions 2 weeks apart; cyclophosphamide dose = 1000 mg/m<sup>2</sup> monthly; IV corticosteroid = 1000 mg methylprednisolone monthly
